# Supplementary material for: Tuning the Thermogelation and Rheology of Poly(2-Oxazoline)/Poly(2-Oxazine)s Based Thermosensitive Hydrogels for 3D Bioprinting
Source: MDPI journal article supplement (doi:10.3390/gels7030078), 2021-06-24
Supplement: s1 [file s1]

## Supporting information

Malik Salman Haider <sup>1,\*</sup>, Taufiq Ahmad <sup>2</sup>, Mengshi Yang <sup>1</sup>, Chen Hu <sup>1</sup>, Lukas Hahn <sup>1</sup>, Philipp Stahlhut <sup>2</sup>, Jürgen Groll <sup>2</sup> and Robert Luxenhofer <sup>1,3,\*</sup>

<sup>1</sup> Functional Polymer Materials, Chair for Advanced Materials Synthesis, Institute for Functional Materials and Biofabrication, Department of Chemistry and Pharmacy, Julius-Maximilians-University Würzburg, Röntgenring 11, 97070 Würzburg, Germany; [mengshi.yang@uni-wuerzburg.de](mailto:mengshi.yang@uni-wuerzburg.de) (M.Y.); [chen.hu@uni-wuerzburg.de](mailto:chen.hu@uni-wuerzburg.de) (C.H.); [lukas.hahn@uni-wuerzburg.de](mailto:lukas.hahn@uni-wuerzburg.de) (L.H.)

<sup>2</sup> Department of Functional Materials in Medicine and Dentistry, Institute for Functional Materials and Biofabrication and Bavarian Polymer Institute, Julius-Maximilians-University Würzburg, Pleicherwall 2, 97070 Würzburg, Germany; [taufiq.ahmad@fmz.uni-wuerzburg.de](mailto:taufiq.ahmad@fmz.uni-wuerzburg.de) (T.A.); [philipp.stahlhut@fmz.uni-wuerzburg.de](mailto:philipp.stahlhut@fmz.uni-wuerzburg.de) (P.S.); [juergen.groll@fmz.uni-wuerzburg.de](mailto:juergen.groll@fmz.uni-wuerzburg.de) (J.G.)

<sup>3</sup> Soft Matter Chemistry, Department of Chemistry and Helsinki Institute of Sustainability Science, Faculty of Science, University of Helsinki, PB 55, 00014 Helsinki, Finland

\* Correspondence: [malik.haider@uni-wuerzburg.de](mailto:malik.haider@uni-wuerzburg.de) (M.S.H.); [robert.luxenhofer@helsinki.fi](mailto:robert.luxenhofer@helsinki.fi) (R.L.)

### Table of Contents:

#### Synthesis of pPrOzi-*b*-pEtOx 50 repeat units

#### Synthesis of pPrOzi-*b*-pEtOx 100 repeat units

**Figure S1.** Heat flow occurring during the various heating and cooling cycle (10 K/min) of differential scanning calorimetry of pPrOzi<sub>100</sub>-*b*-pMeOx<sub>100</sub>, green vertical line indicating the glass transition point.

**Figure S2.** a) Amplitude and b) frequency sweep of pPrOzi<sub>100</sub>-*b*-pEtOx<sub>100</sub> diblock copolymer at 20 and 15 wt.% concentration at constant temperature of 25°C.

**Figure S3.** SEM image of 30 wt.% pPrOzi<sub>100</sub>-*b*-pEtOx<sub>100</sub> diblock copolymer lyophilized hydrogel (Top view).

**Figure S4.** a) 3D printability of 25 wt.% pPrOzi<sub>100</sub>-*b*-pEtOx<sub>100</sub> based hydrogel, a 5 layered star (pressure; 90kPa, speed 2mm/sec). b) cryo-SEM image of the 25 wt.% pPrOzi<sub>100</sub>-*b*-pEtOx<sub>100</sub> diblock copolymer with 1 wt.% laponite XLG.

**Figure S5.** Comparison of rheological properties of pristine (25 wt.%) and hybrid hydrogel (25 + 1 wt.% clay) prepared in water including a) temperature dependent sweep (from 5 to 60°C), b) amplitude sweep, c) yield stress and flow point, d) frequency sweep, e) shear thinning and f) structure recovery properties (at 25°C).

**Figure S6.** Visual appearance of 30 wt.% pPrOzi<sub>100</sub>-*b*-pEtOx<sub>100</sub> diblock copolymer hydrogel in water (blue) and cell culture media (magenta). Comparison of rheological properties of hydrogel prepared in water and media including temperature dependent sweep (from 5 to 60°C), frequency sweep, angular sweep, shear thinning and structure recovery properties (at 25°C).

**Figure S7.** Live/dead viability assay of post-printing cell laden bioink a) serpentine line and b) a star showing the dead cells (red). Arrows indicating the dead cells and dashed lines are added for eye guidance.

### Synthesis of pPrOzi<sub>150</sub>-*b*-pEtOx<sub>50</sub> diblock copolymer

Initiation: MeOTf 0.0722 g (0.44 mmol; 1 eq)

1. Block: PrOzi 2.77 g (21.8 mmol; 50 eq)

2. Block: EtOx 2.16g (21.8 mmol; 50 eq)

Termination: EPC 0.22 g (1.42 mmol; 3.2 eq) (Ethyl isonipicotate)

Solvent Benzonitrile 9 ml

Yield: 4.5 g of white powder 84%

GPC (HFIP)  $M_n = 4.5$  kg/mol;  $\bar{D} = 1.3$

<sup>1</sup>H-NMR  $M_n = 11.3$  kg/mol (pPrOzi<sub>47</sub>- pEtOx<sub>52</sub>)

### Synthesis of pPrOzi<sub>100</sub>-*b*-pEtOx<sub>100</sub> diblock copolymer

Initiation: MeOTf 0.0718 g (0.437 mmol; 1 eq)

1. Block: PrOzi 5.56 g (43.79 mmol; 100 eq)

2. Block: EtOx 4.34 g (43.79 mmol; 100 eq)

Termination: BocPip 0.245 g (1.31 mmol; 3 eq)

K<sub>2</sub>CO<sub>3</sub> 0.06 g (0.43 mmol; 1 eq)

Solvent Benzonitrile 10 ml

Yield: 7 g of white powder 70 %

GPC (HFIP)  $M_n = 9.1$  kg/mol;  $\bar{D} = 1.40$

<sup>1</sup>H-NMR  $M_n = 25.9$  kg/mol (pPrOzi<sub>112</sub>- pEtOx<sub>117</sub>)

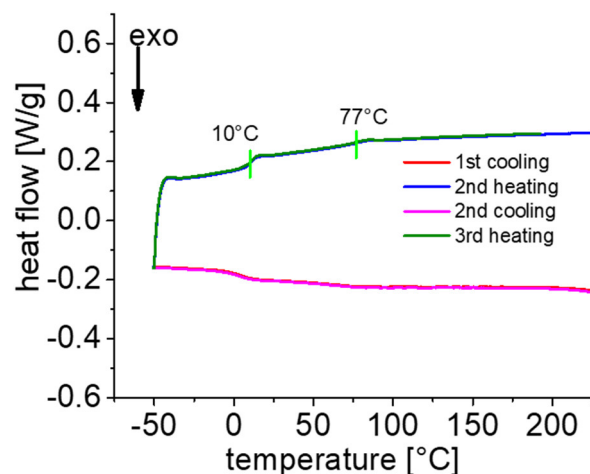

**Figure S1.** Heat flow occurring during the various heating and cooling cycle (10 K/min) of differential scanning calorimetry of pPrOzi<sub>100</sub>-*b*-pMeOx<sub>100</sub>, green vertical line indicating the glass transition point.

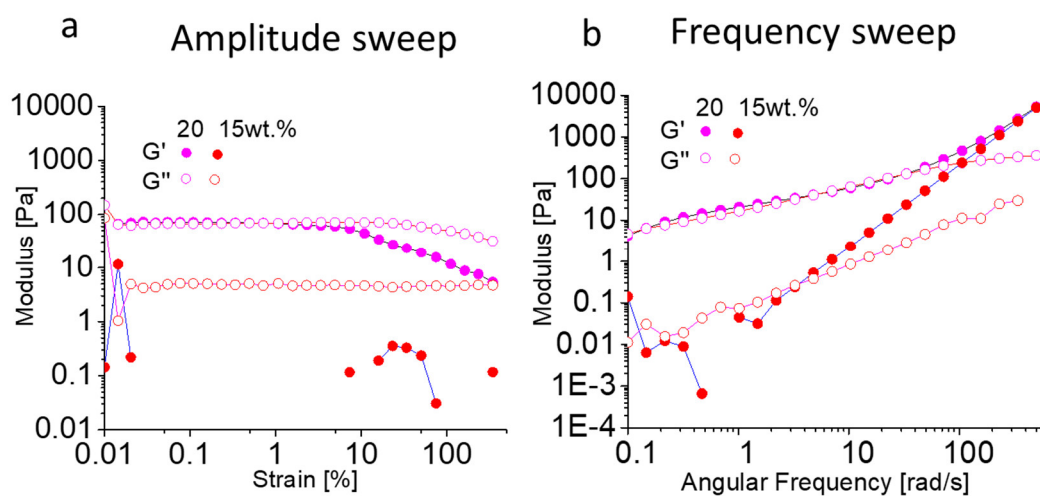

**Figure S2.** a) Amplitude and b) frequency sweep of pPrOzi<sub>100</sub>-*b*-pEtOx<sub>100</sub> diblock copolymer at 20 and 15 wt.% concentration at constant temperature of 25°C.

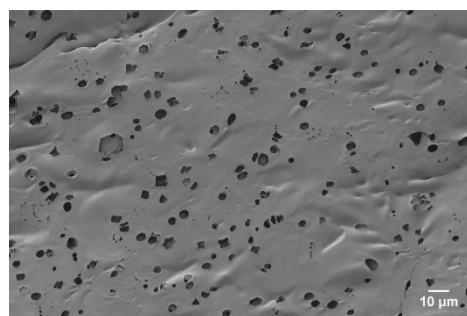

**Figure S3.** SEM image of 30 wt.% pPrOzi<sub>100</sub>-*b*-pEtOx<sub>100</sub> diblock copolymer lyophilized hydrogel (Top view).

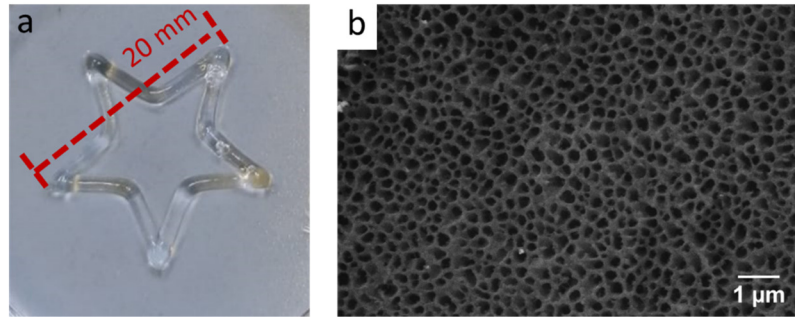

**Figure S4.** a) 3D printability of 25 wt.% pPrOzi<sub>100</sub>-b-pEtOx<sub>100</sub> based hydrogel, a 5 layered star (pressure; 90kPa, speed 2mm/sec). b) cryo-SEM image of the 25 wt.% pPrOzi<sub>100</sub>-b-pEtOx<sub>100</sub> diblock copolymer with 1 wt.% laponite XLG. .

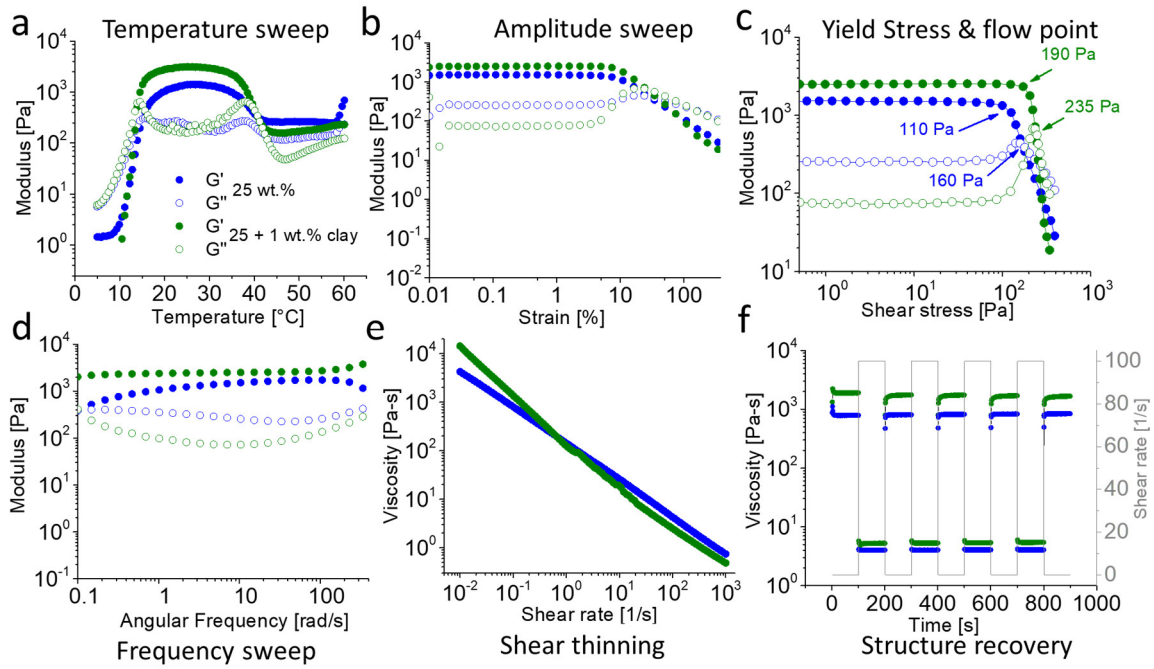

**Figure S5.** Comparison of rheological properties of pristine (25 wt.%) and hybrid hydrogel (25 + 1 wt.% clay) prepared in water including a) temperature dependent sweep (from 5 to 60°C), b) amplitude sweep, c) yield stress and flow point, d) frequency sweep, e) shear thinning and f) structure recovery properties (at 25°C).

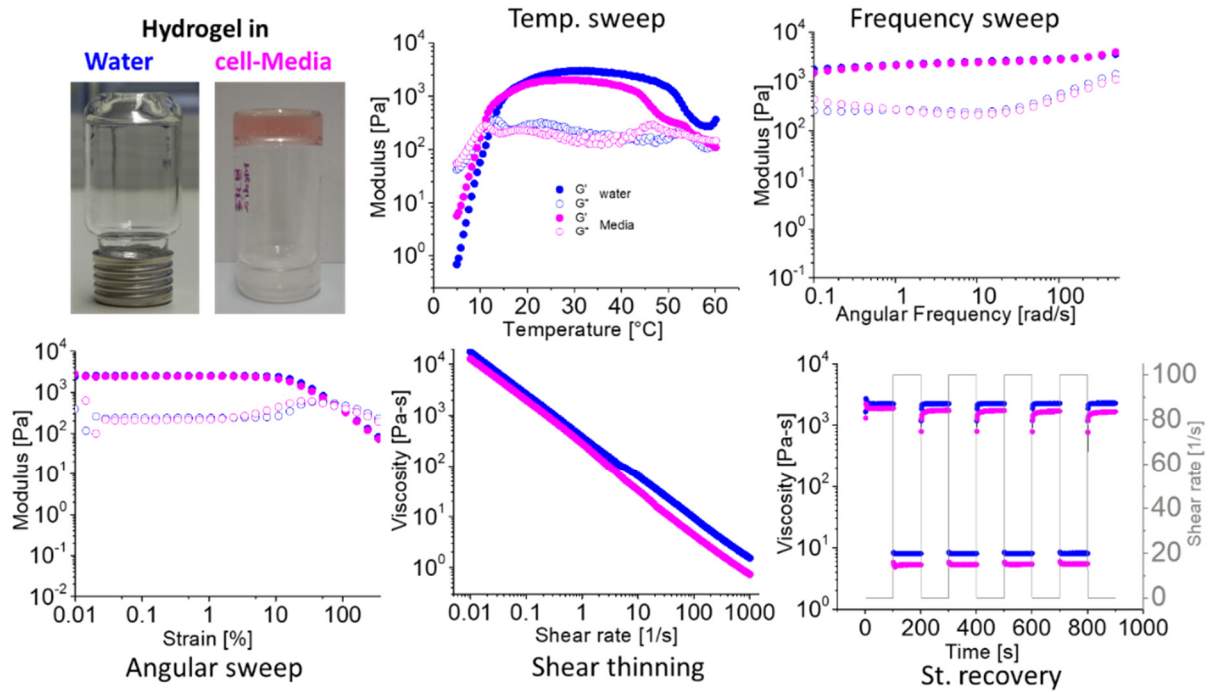

**Figure S6.** Visual appearance of 30 wt.% pPrOzi100-*b*-pEtOx100 diblock copolymer hydrogel in water (blue) and cell culture media (magenta). Comparison of rheological properties of hydrogel prepared in water and media including temperature dependent sweep (from 5 to 60°C), frequency sweep, angular sweep, shear thinning and structure recovery properties (at 25°C).

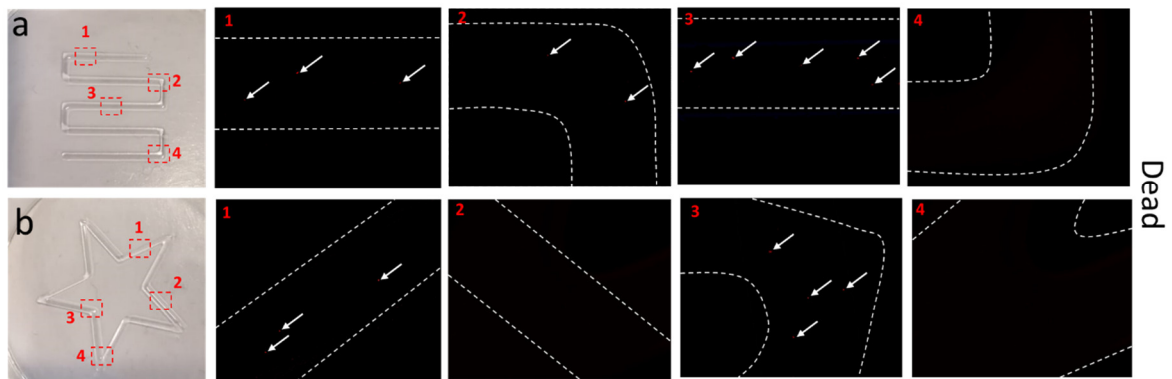

**Figure S7.** Live/dead viability assay of post-printing cell laden bioink a) serpentine line and b) a star showing the dead cells (red). Arrows indicating the dead cells and dashed lines are added for eye guidance.
